# Supplementary material
Source: Research Square preprint supplement (doi:10.21203/rs.3.rs-9345540/v1)
Supplement: Supplementary file 1 [file fbc049e8928e8810684a9fb4.docx]

**Table (1): Demographic Data of the studied patients**

| **Demographic data** | **All patients** | **Final result** | | **Test of significance**  ***p*-value** |
| --- | --- | --- | --- | --- |
| **Negative** | **Positive** |
| **Age (years)**   - n - Min. – Max. - Mean ± S.D. - SEM - Median - 95% CI of the median - 25th- 75th Percentile | 37  19.00 – 67.00  43.41 ± 15.08  2.48  44.00  33.00 – 52.00  30.00 – 56.00 | 23  23.00 – 67.00  48.04 ± 14.06  2.93  52.00  44.00 – 59.00  33.00 – 59.00 | 14  19.00 – 65.00  35.79 ± 13.96  3.73  32.50  27.00 – 49.00  27.00 – 49.00 | Z(MW)=2.366 *p*=.018* |
| **Sex Male**   - n - % within Sex - % within Final result | 27  100.00%  72.97% | 16  59.26%  69.57% | 11  40.74%  78.57% | χ2(df=1) =0.358 *p*=.550 NS |
| **Female**   - n - % within Sex - % within Final result | 10  100.00%  27.03% | 7  70.00%  30.43% | 3  30.00%  21.43% |  |

n: Number of patients Min-Max: Minimum – Maximum

S.D.: Standard Deviation

CI: Confidence interval

**Table (2): Distribution of Complaints in the studied patients**

| **Complaints** | **Final result** | | **Test of Significance**  ***p-value***  ***odds ratio (95% CI)*** |
| --- | --- | --- | --- |
| **Negative** | **Positive** |
| **Dyspnea (n=33) (89.19%)**   - n % - % within Dyspnea - % within Final result | 20  60.61%  86.96% | 13  39.39%  92.86% | χ2(df=1)=0.314  *p*=.575 NS  1.950 (0.183–20.827) |
| **Weight loss (n=18) (48.65%)**   - n % - % within Weight loss - % within Final result | 9  50.00%  39.13% | 9  50.00%  64.29% | χ2(df=1)=2.204  *p*=.138 NS  2.800 (0.706–11.097) |
| **Chest pain (n=16) (43.24%)**   - n % - % within Chest pain - % within Final result | 13  81.25%  56.52% | 3  18.75%  21.43% | χ2(df=1) =4.367 *p*=.037*  0.210 (0.046–0.959) |
| **Night sweating (n=11) (29.73%)**   - n % - % within Night sweating - % within Final result | 5  45.45%  21.74% | 6  54.55%  42.86% | χ2(df=1)=1.858  *p*=.173 NS  2.700 (0.633–11.509) |
| **Fever (n=21) (56.76%)**   - n % - % within Fever - % within Final result | 13  61.90%  56.52% | 8  38.10%  57.14% | χ2(df=1) =0.001  *p*=.970 NS  1.026 (0.268–3.923) |
| **Hemoptysis (n=14) (37.84%)**   - n % - % within Hemoptysis - % within Final result | 10  71.43%  43.48% | 4  28.57%  28.57% | χ2(df=1)=0.822  *p*=.365 NS  0.520 (0.125–2.157) |
| **Cough (n=35) (94.59%)**   - n % - % within Cough - % within Final result | 21  60.00%  91.30% | 14  40.00%  100.00% | χ2(df=1)=1.287  *p*=.257 NS  1.667 (1.272–2.184) |

n: number of patients

χ2 : Pearson Chi-Square

df=degree of freedom

CI: 95% Confidence Interval

NS: Statistically not significant (*p*>.05)

*: Statistically significant (*p*<.05)

**Table (3): CT findings in the studied patients**

| **CT findings** | **Final result** | | **Test of Significance**  ***p-value***  ***odds ratio (95% CI)*** |
| --- | --- | --- | --- |
| **Negative** | **Positive** |
| **Cavitary lesions (n=26) (70.27%)**   - n % - % within CT cavitary lesions - % within Final result | 16  61.54%  69.57% | 10  38.46%  71.43% | χ2(df=1) =0.014  *p*=.904 NS  1.094 (0.254 – 4.713) |
| **Parenchymal infiltrates (n=32) (86.49%)**   - n % - % within CT parenchymal infiltrates - % within Final result | 19  59.38%  82.61% | 13  40.63%  92.86% | χ2(df=1) =0.782  *p*=.377 NS  2.737 (0.274 – 27.354) |
| **Pleural effusion (n=8) (21.62%)**   - n % - % within CT pleural effusion - % within Final result | 5  62.50%  21.74% | 3  37.50%  21.43% | χ2(df=1) =0.000  *p*=.982 NS  0.982 (0.195 – 4.941) |

n: number of patients

CI: 95% Confidence Interval

χ2 :Pearson Chi-Square

df=degree of freedom

NS: Statistically not significant (*p*>.05)

**Table (4): Comparison of smear results in the studied patients**

| **Smear** | **Final result** | | **Total (n=37)** |
| --- | --- | --- | --- |
| **Negative (n=23)** | **Positive (n=13)** |
| **Negative**   - n % - % within Smear - % within Final result | 23  85.19%  100.00% | 4  14.81%  28.57% | 27  100.00%  72.97% |
| **Positive**   - n % - % within Smear - % within Final result | 0  0.00%  0.00% | 10  100.00%  71.43% | 10  100.00%  27.03% |
| **Test of Significance**  ***p-value***  ***odds ratio (95% CI)*** | χ2(df=1) =22.513  *p*<.001*  0.148 (0.060 – 0.366) | | |

n: number of patients

χ2 : Pearson Chi-Square

df=degree of freedom

*: Statistically significant (p<.05)

NS: Statistically not significant (*p*>.05)

CI: 95% Confidence Interval

**Table (5): Comparison of culture results in the studied patients**

| **Culture** | **Final result** | | **Total (n=37)** |
| --- | --- | --- | --- |
| **Negative (n=23)** | **Positive (n=13)** |
| **Negative**   - n % - % within culture - % within Final result | 23  85.19%  100.00% | 1  4.17%  7.147% | 24  100.00%  64.86% |
| **Positive**   - n % - % within culture - % within Final result | 0  0.00%  0.00% | 13  100.00%  92.86% | 13  100.00%  35.14% |
| **Test of Significance**  ***p-value***  ***odds ratio (95% CI)*** | χ2(df=1) =32.926  *p*<.001*  0.042 (0.006–0.284) | | |

n: number of patients

χ2 : Pearson Chi-Square

df=degree of freedom

*: Statistically significant (p<.05)

NS: Statistically not significant (*p*>.05)

CI: 95% Confidence Interval

**Table (6): ADA (IU/L) of the studied patients**

| **ADA** | **All patients**  **(n=37)** | **Final result** | | **Test of significance *p*-value** |
| --- | --- | --- | --- | --- |
| **Negative**  **(n=23)** | **Positive**  **(n=14)** |
| - Min. – Max. - Mean ± S.D. - SEM - Median - 95% CI of the median - 25th- 75th Percentile | 0.90-49.00  10.77±8.83  1.45  9.00  8.00-12.00  6.00-13.00 | 0.90-49.00  10.14±10.55  2.20  7.50  6.00-11.00  4.00-12.00 | 2.40-20.00  11.80±5.05  1.35  10.50  8.80-17.00  8.80-17.00 | Z(MW)=1.787 *p*=.074 NS |

n: Number of patients Min-Max: Minimum – Maximum

S.D.: Standard Deviation

CI: Confidence interval

MW: Z Test of Mann-Whitney Test

NS: Statistically not significant (*p*≥.05)
